# Supplementary material for: Hierarchically porous N-doped carbon nanosheets with atomically dispersed Fe/Co dual-metallic sites for efficient and robust oxygen electrocatalysis in Zn–air batteries
Source: Royal Society of Chemistry journal article supplement (doi:10.1039/d2ya00128d), 2022-01-01
Supplement: d2ya00128d1.pdf [file d2ya00128d1.pdf]

## Supporting Information

# Hierarchically porous N-doped carbon nanosheets with atomically dispersed Fe/Co dual-metallic sites for efficient and robust oxygen electrocatalysis in Zn-air batteries

Zheng-Qi Liu<sup>a</sup>, Fei-Xiang Ma<sup>a\*</sup>, Yu-Xuan Xiong<sup>a</sup>, Meng-Tian Zhang<sup>a</sup>, Liang Zhen<sup>a, b</sup>, Cheng-Yan Xu<sup>a, b\*</sup>

<sup>a</sup> Sauvage Laboratory for Smart Materials, School of Materials Science and Engineering, Harbin Institute of Technology (Shenzhen), Shenzhen 518055, China

<sup>b</sup> State Key Laboratory of Advanced Welding and Joining, Harbin Institute of Technology, Harbin 150001, China

Email: mafeixiang@hit.edu.cn; cy\_xu@hit.edu.cn

## Materials

Commercial Pt/C (20 wt% Pt) catalyst was bought from Shanghai Hesun Electric Co., Ltd. (CHN). Nafion solution (5 wt%) was purchased from DuPont (USA). Polyvinylpyrrolidone (PVP, K30), Ferric Nitrate Nonahydrate ( $\text{Fe}(\text{NO}_3)_3 \cdot 9\text{H}_2\text{O}$ , Analytical reagent, 98%), Cobalt(II) Nitrate Hexahydrate ( $\text{Co}(\text{NO}_3)_2 \cdot 6\text{H}_2\text{O}$ , Analytical reagent, 99%), Nickel(II) chloride hexahydrate ( $\text{NiCl}_2 \cdot 6\text{H}_2\text{O}$ , Analytical reagent, 99%), Hydrochloric acid (HCl, Analytical reagent, 37%), Manganese(II) Nitrate Tetrahydrate ( $\text{Mn}(\text{NO}_3)_2 \cdot 4\text{H}_2\text{O}$ , Analytical reagent,  $\geq 98\%$ ) were bought from Adamas-beta(CHN). Dicyandiamide ( $\text{C}_2\text{H}_4\text{N}_4$ , Analytical reagent, 99%), Potassium hydroxide (KOH, Analytical reagent, 90%), Copper chloride dihydrate ( $\text{CuCl}_2 \cdot 2\text{H}_2\text{O}$ , Analytical reagent,  $\geq 99\%$ ), Iron(III) chloride hexahydrate ( $\text{FeCl}_3 \cdot 6\text{H}_2\text{O}$ , Analytical reagent,  $\geq 99\%$ ), Isopropanol ( $(\text{CH}_3)_2\text{CHOH}$ , Analytical reagent,  $\geq 99.7\%$ ) and Ethanol ( $\text{C}_2\text{H}_5\text{OH}$ , Analytical reagent,  $\geq 99.7\%$ ) were purchased from General-Reagent (CHN). All of the chemicals were used directly without further purification. Deionized water was used for all experiments.

## Electrochemical measurements

Electrochemical measurements were carried out in a three-electrode system on a CHI 760E electrochemical workstation (Shanghai Chenhua, China) coupled with a RRDE-3A (Rotating Ring Disk Electrode Apparatus Ver.2.0 ALS Co., Ltd Japan) in 0.1 M KOH electrolyte. A glassy carbon (GC) RDE of 3 mm in diameter was served as the working electrode, a saturated calomel electrode (SCE) and a carbon rod were used as reference and counter electrode, respectively. All electrode potential in this work were converted into reversible hydrogen electrode potentials (RHE), using the calibration equation ( $E_{\text{RHE}} = E_{\text{SCE}} + 0.244 + 0.059\text{pH}$ ).

Cyclic voltammetry (CV) measurement. Before the test, the electrolyte was saturated with oxygen by bubbling  $\text{O}_2$  20 min to ensure its oxygen saturation state. The working electrode was

electroactivated by conducting 30 voltammetric cycles at  $50 \text{ mV s}^{-1}$  with the potential ranging from 0.2 to 1.1 V vs. RHE in order to get stable curves. A flow of  $\text{O}_2$  was maintained in the electrolyte during the recording of CVs.

Rotating disk electrode (RDE) measurement. The working electrode was scanned cathodically at a rate of  $5 \text{ mV s}^{-1}$  and a potential range of 0.2 to 1.1 V vs. RHE with varying rotating speed from 900 rpm to 2500 rpm. Koutecky–Levich (K-L) plots were analyzed at various electrode potentials. The slopes of their best linear fit lines were used to calculate the number of electrons transferred number ( $n$ ) and kinetic current density ( $J_K$ ) on the basis of the K-L equation.

$$1/J = 1/J_K + 1/J_L = 1/J_K + 1/(B\omega^{1/2})$$

$$B = 0.62nFC_0D_0^{2/3}\nu^{-1/6}$$

$$J_K = nFkC_0$$

$J$  ----- current density,

$J_K$  ----- kinetic current density

$J_L$  ----- limiting current density

$\omega$  ----- Angular Velocity

$n$  ----- Total Electron Transfer Number

$F$  ----- Faraday constant ( $96485 \text{ C mol}^{-1}$ ),

$D_0$  ----- Diffusion Coefficient of  $\text{O}_2$  ( $1.9 \times 10^{-5} \text{ cm}^2 \cdot \text{s}^{-1}$ )

$C_0$  ----- Bulk concentration of  $\text{O}_2$  ( $1.2 \times 10^{-6} \text{ mol cm}^{-3}$ ),

$\nu$  ----- Kinematic viscosity of the electrolyte ( $0.01 \text{ cm}^2 \text{ s}^{-1}$ ),

$k$  ----- Electron-transfer rate constant.

For the Tafel plot, the kinetic current density (rotating speed of 1600 rpm) for assessing the ORR

kinetics was calculated from the mass-transport correction of the RDE data by:

$$J_K = J^* J_L / (J_L - J)$$

Turn-Over frequency (TOF) of the Fe/Co-N-C, Fe-N-C and Pt/C were calculated based on the mole number of active Fe-Co dual sites, Fe single sites and Pt single sites, respectively. The TOF values were calculated using the equation:

$$TOF = I / (4 * m * F)$$

Where I is the measured current at 0.85 V, 4 is the number of electrons transferred during O<sub>2</sub> reduction, m is the mole number of active Fe-Co dual sites, Fe single sites and Pt single sites on the electrode, and F is the Faraday constant (F = 96,485 C mol<sup>-1</sup>).

Rotating ring-disk electrode (RRDE) measurement. H<sub>2</sub>O<sub>2</sub> produced at the disk electrode can be detected by the ring electrode. The disk electrode was scanned cathodically at a rate of 5 mV s<sup>-1</sup> and the ring potential was constant at 1.3 V vs. RHE. The hydrogen peroxide yield [H<sub>2</sub>O<sub>2</sub> (%)] and the electron transfer number (n) were determined by the followed equations:

$$H_2O_2(\%) = 200 * (I_R / N) / (I_R / N + I_D)$$

$$n = 4 * I_D / (I_R / N + I_D)$$

$I_D$  ----- Disk Current

$I_R$  ----- Ring Current

$N$  ----- Ring Collection Coefficient (N=0.4)

The electrochemical durability of the catalysts with respect to commercial Pt/C by using chronoamperometric (CA) measurements at 0.51 V (vs. RHE) for 12 hours in O<sub>2</sub>-saturated 0.1 M KOH at a rotation rate of 1600 rpm.

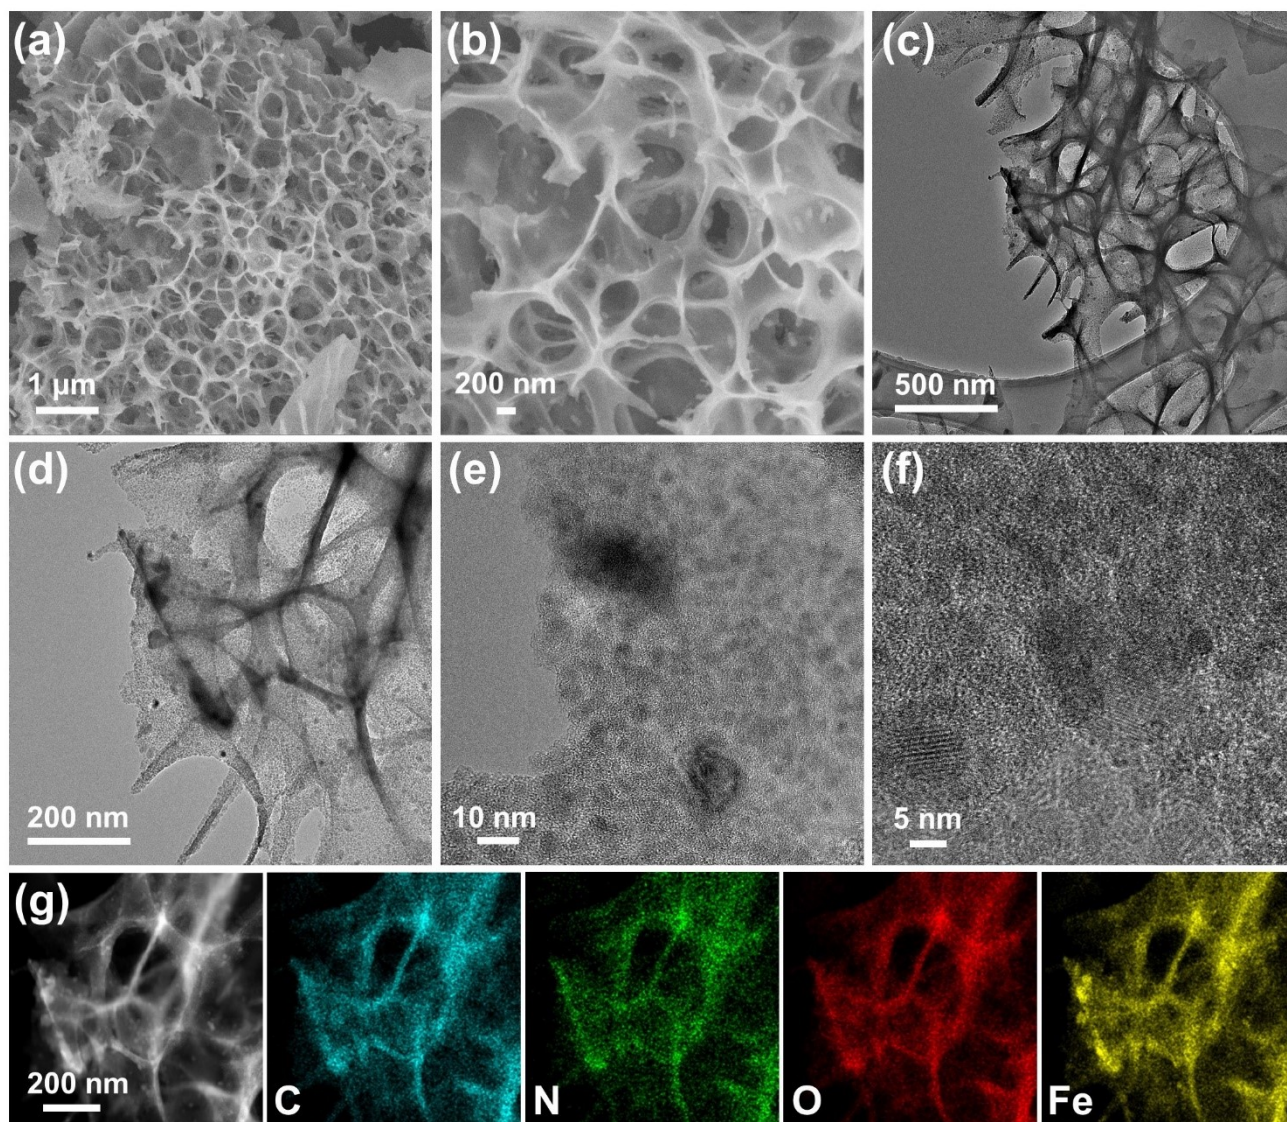

**Figure S1** Microstructure characterization of as-prepared carbon nanosheets uniformly decorated with iron nanoparticles. (a, b) SEM, (c-e) TEM, (f) HRTEM images and (g) elemental mapping of C, N, O and Fe.

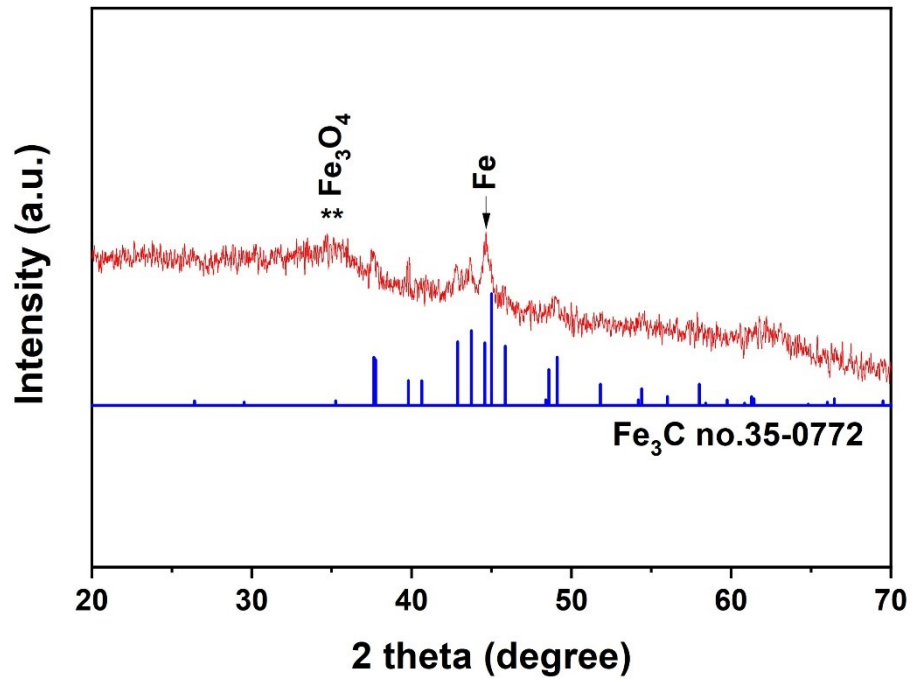

**Figure S2** XRD patterns of carbon nanosheets uniformly decorated with iron nanoparticles.

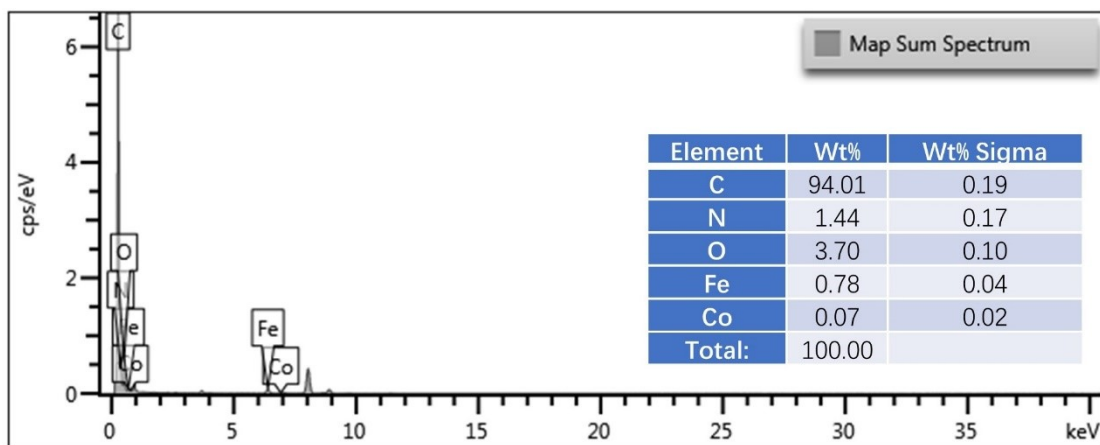

**Figure S3** The elements contents for Fe/Co-N-C

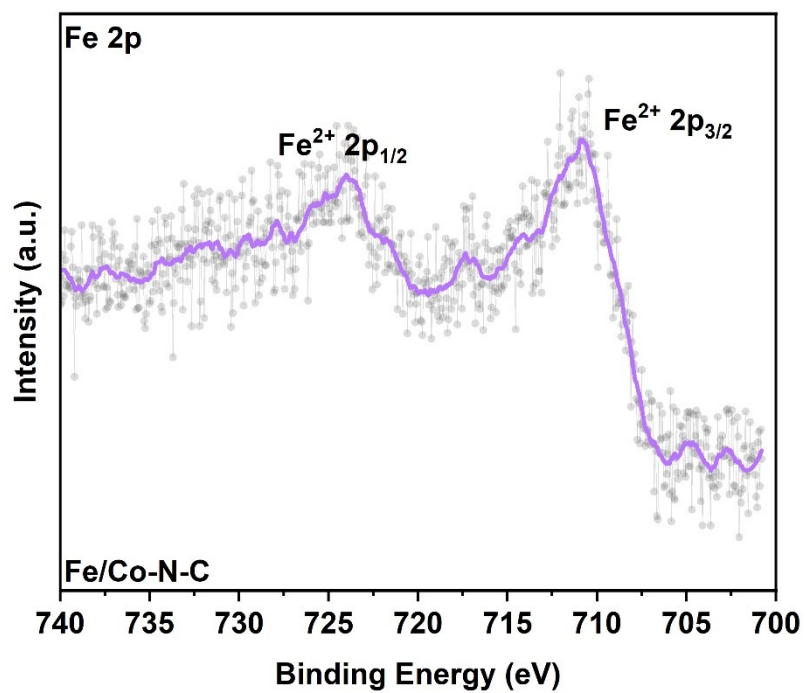

Figure S4. XPS Fe 2p spectra of Fe/Co-N-C.

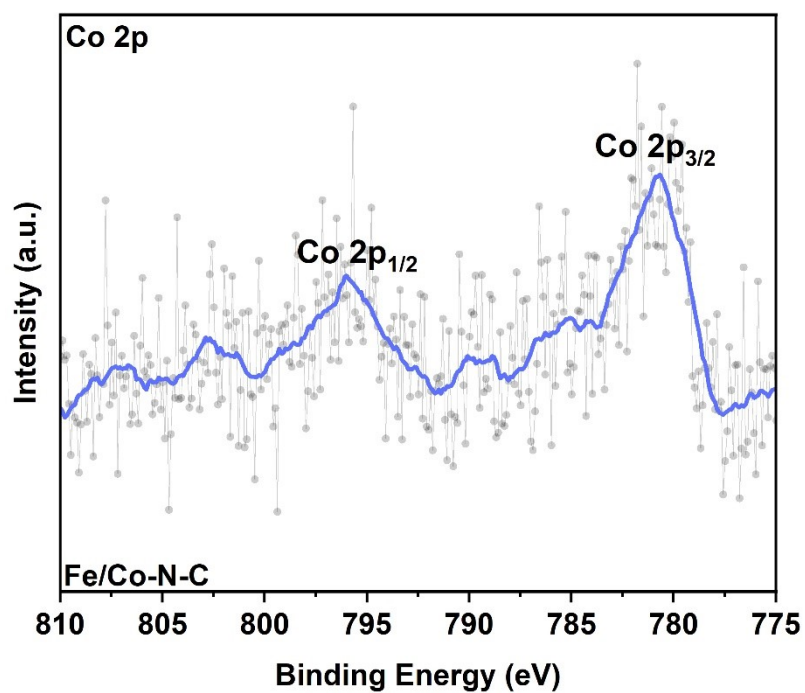

Figure S5. XPS Co 2p spectra of Fe/Co-N-C.

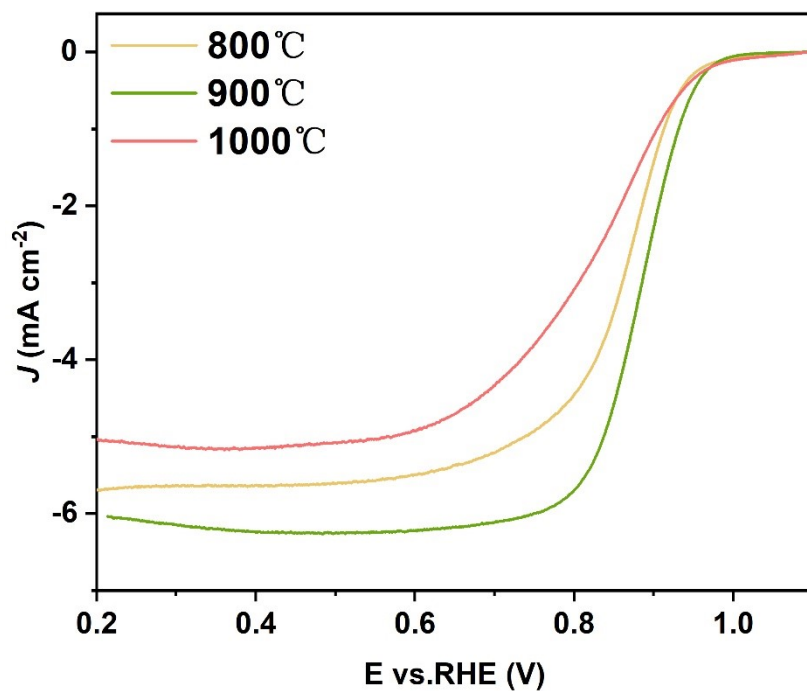

Figure S6. ORR polarization curves of Fe/Co-N-C at different annealing temperatures.

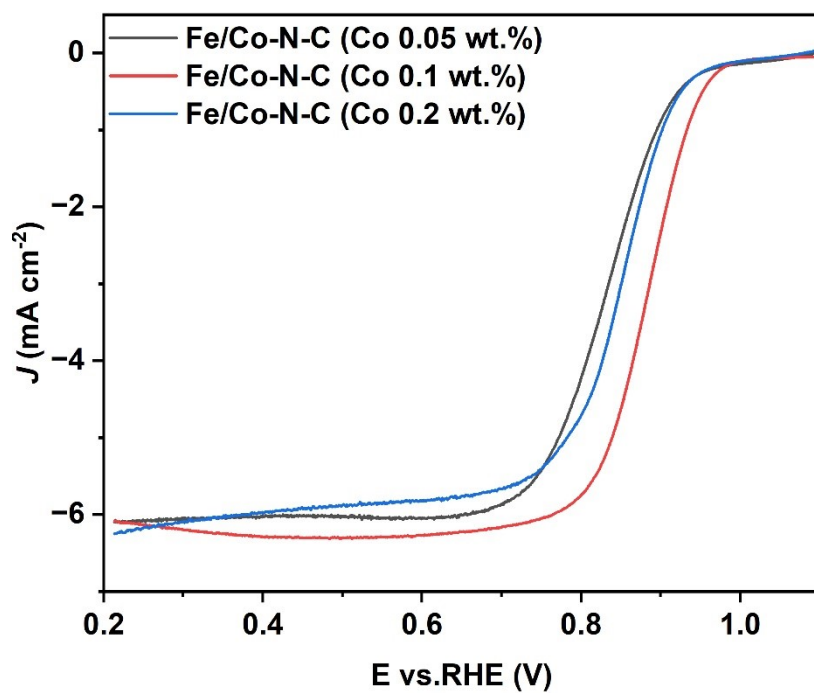

Figure S7. ORR polarization curves of Fe/Co-N-C with different cobalt content at 900 °C.



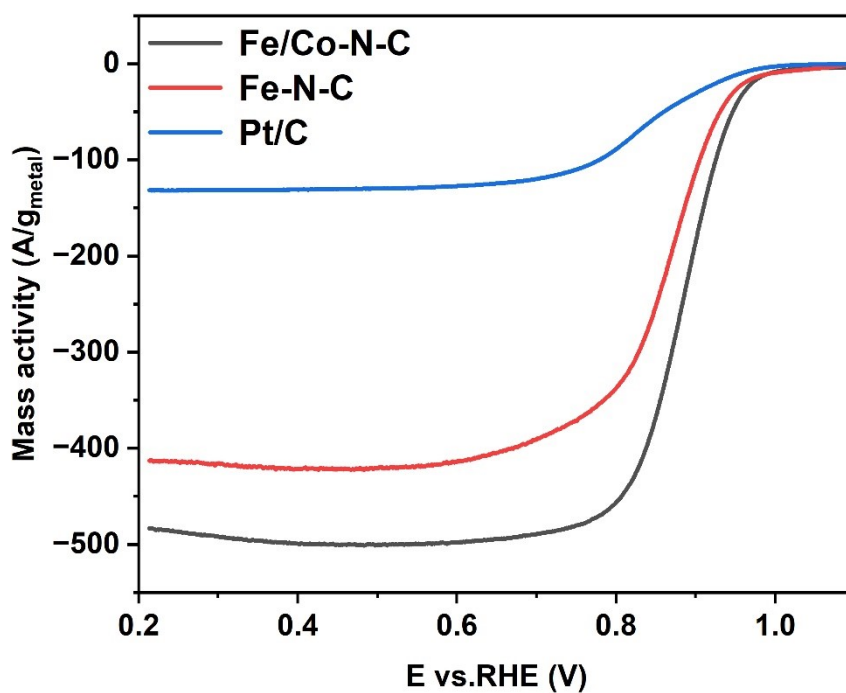

**Figure S8.** Mass activity comparison of Fe/Co-N-C, Fe-N-C and commercial Pt/C.

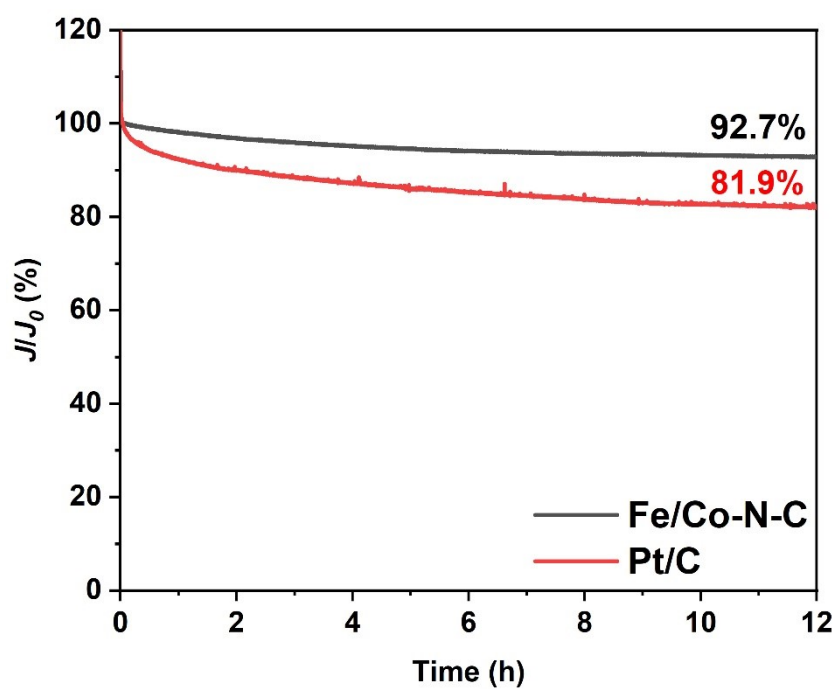

**Figure S9.** Durability comparison between Fe/Co-N-C and commercial Pt/C tested at 0.5 V vs RHE.

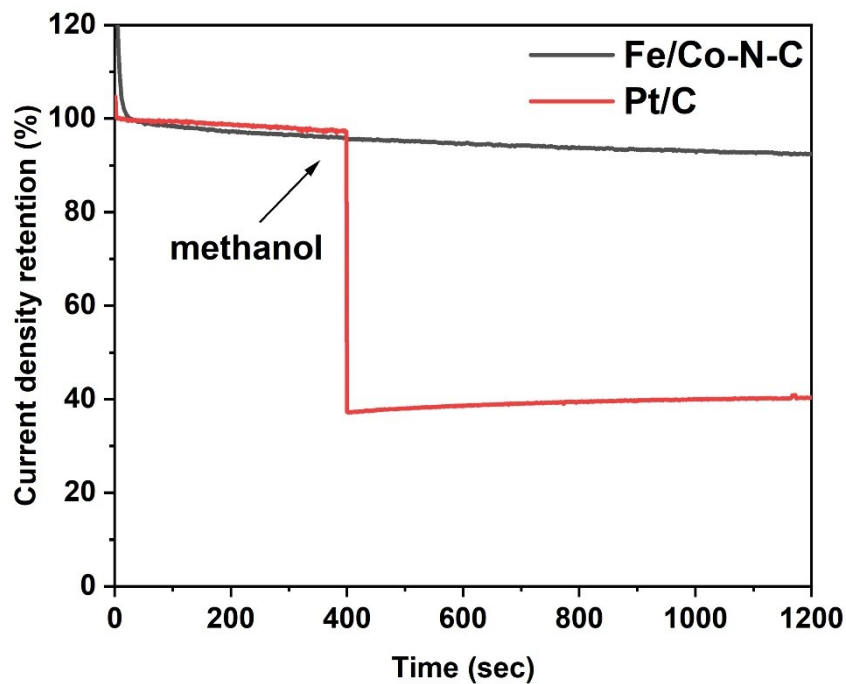

**Figure S10.** Current density retention curves of Fe/Co-N-C and Pt/C at 0.5 V in 0.1 M KOH with re-addition of 1 M methanol.

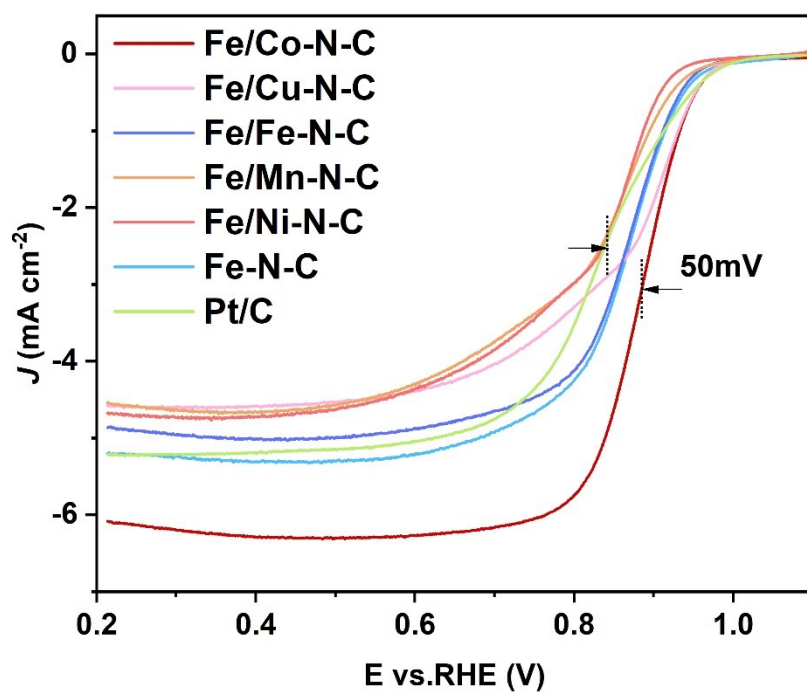

**Figure S11.** ORR polarization curves for Fe/Co-N-C and Fe-N-C compared with adsorb other metals.

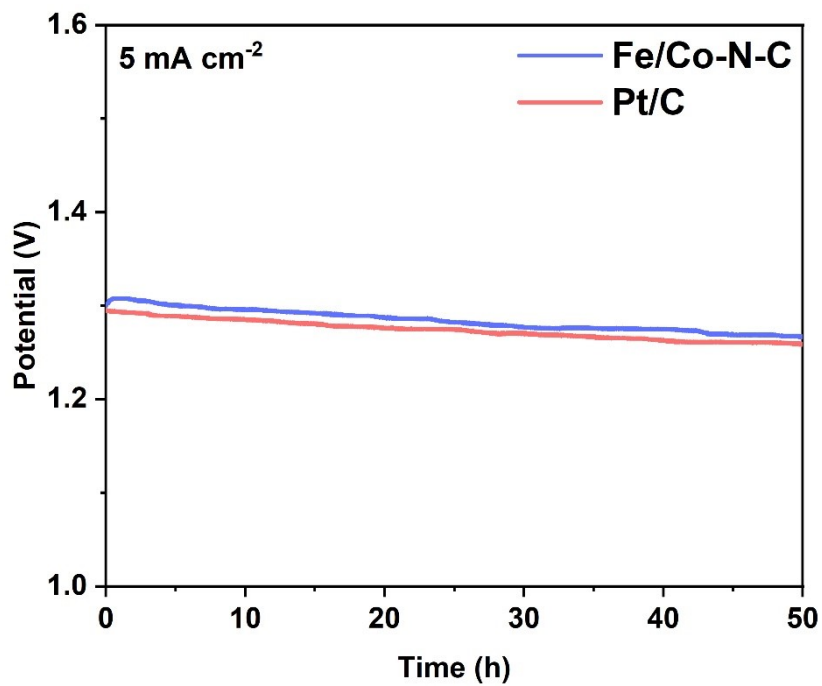

**Figure S12.** Galvanostatic discharge curves of zinc-air batteries at a current density of 5 mA·cm<sup>-2</sup>.

**Table S1.** Comparison of ORR catalytic performances in alkaline solution between Fe/Co-N-C series catalysts and other previously reported catalysts.

| Catalyst                                                      | $E_{1/2}$ (V) | $J_d$ (mA cm <sup>-2</sup> ) @0.5 V | Reference |
|---------------------------------------------------------------|---------------|-------------------------------------|-----------|
| <b>Fe/Co-N-C</b>                                              | 0.88          | 6.2                                 | This work |
| <b>Fe,Co,N-CNP(0.3)</b>                                       | 0.875         | 5.355                               | [1]       |
| <b>Fe<sub>1.2</sub>Co@NC/NCNTs</b>                            | 0.82          | 5.5                                 | [2]       |
| <b>Fe<sub>1</sub>Co<sub>7</sub>-N-C</b>                       | 0.816         | 4.86                                | [3]       |
| <b>Fe,Co-NPC-800</b>                                          | 0.855         | 6.32                                | [4]       |
| <b>Fe-Co-N-OMC (1:1)</b>                                      | 0.83          | 5.7                                 | [5]       |
| <b>FeCo-N-HCN</b>                                             | 0.86          | 5.3                                 | [6]       |
| <b>Fe<sub>1</sub>Co<sub>1</sub>-CNF</b>                       | 0.87          | 5.4                                 | [7]       |
| <b>Fe-Co(0.4)/N-rGO-AL</b>                                    | 0.84          | 5.2                                 | [8]       |
| <b>Co/Fe-NC</b>                                               | 0.847         | 5.82                                | [9]       |
| <b>Fe<sub>3</sub>C/CoFe<sub>2</sub>O<sub>4</sub>@CNFs-1.5</b> | 0.84          | 5.9                                 | [10]      |

## References

- [1] Z. Hu, Z. Guo, Z. Zhang, M. Dou, F. Wang, Bimetal Zeolitic Imidazolate Framework-Derived Iron-, Cobalt- and Nitrogen-Codoped Carbon Nanopolyhedra Electrocatalyst for Efficient Oxygen Reduction, *ACS Appl Mater Interfaces* 10(15) (2018) 12651-12658.
- [2] S. Li, W. Chen, H. Pan, Y. Cao, Z. Jiang, X. Tian, X. Hao, T. Maiyalagan, Z.-J. Jiang, FeCo Alloy Nanoparticles Coated by an Ultrathin N-Doped Carbon Layer and Encapsulated in Carbon Nanotubes as a Highly Efficient Bifunctional Air Electrode for Rechargeable Zn-Air Batteries, *ACS Sustainable Chemistry & Engineering* 7(9) (2019) 8530-8541.
- [3] Z.Y. Zu, J.L. Mi, B. Wu, L. Liu, Fe/Co Containing N-Doped Hierarchical Porous Carbon Microcuboids and Microcylinders as Efficient Catalysts for Oxygen Reduction Reaction, *ChemCatChem* 12(22) (2020) 5780-5788.
- [4] X. Jia, W. Gu, S. Zhang, E. Wang, In Situ Formation of Hierarchical Porous Fe,Co-N-Doped Carbon as a Highly Efficient Electrocatalyst for Oxygen Reduction, *ChemElectroChem* 4(8) (2017) 2005-2011.
- [5] W. Ran, J. Dong, T. Sun, J. Chen, L. Xu, Iron, Cobalt, and Nitrogen Tri-Doped Ordered Mesoporous Carbon as a Highly Efficient Electrocatalyst for Oxygen Reduction Reaction, *ChemistrySelect* 4(26) (2019) 7728-7733.
- [6] H. Li, Y. Wen, M. Jiang, Y. Yao, H. Zhou, Z. Huang, J. Li, S. Jiao, Y. Kuang, S. Luo, Understanding of Neighboring Fe-N<sub>4</sub>-C and Co-N<sub>4</sub>-C Dual Active Centers for Oxygen Reduction Reaction, *Advanced Functional Materials* 31(22) (2021).
- [7] Y. Wang, Z. Li, P. Zhang, Y. Pan, Y. Zhang, Q. Cai, S.R.P. Silva, J. Liu, G. Zhang, X. Sun, Z. Yan, Flexible carbon nanofiber film with diatomic Fe-Co sites for efficient oxygen reduction and evolution reactions in wearable zinc-air batteries, *Nano Energy* 87 (2021).
- [8] Q. Niu, J. Guo, Y. Tang, X. Guo, J. Nie, G. Ma, Sandwich-type Bimetal-Organic Frameworks/Graphene Oxide Derived Porous Nanosheets doped Fe/Co-N Active Sites for Oxygen Reduction Reaction, *Electrochimica Acta* 255 (2017) 72-82.
- [9] Y. Wang, Y. Pan, L. Zhu, H. Yu, B. Duan, R. Wang, Z. Zhang, S. Qiu, Solvent-free assembly of Co/Fe-containing MOFs derived N-doped mesoporous carbon nanosheets for ORR and HER, *Carbon* 146 (2019) 671-679.
- [10] Y. Sun, Y. Li, S. You, X. Li, Y. Zhang, Z. Cai, M. Liu, N. Ren, J. Zou, Fe<sub>3</sub>C/CoFe<sub>2</sub>O<sub>4</sub> nanoparticles wrapped in one-dimensional MIL-53(Fe)-derived carbon nanofibers as efficient dual-function oxygen catalysts, *Chemical Engineering Journal* 424 (2021) 130460.
